# Supplementary material
Source: PubMed Central journal article supplement (PMC9717658)
Supplement: KID.0000352022-s0001.pdf [file KID.0000352022-s0001.pdf]

## **Supplemental Material**

1. Template of the Kidney Palliative Care Clinic Note
2. Exit Interview Questions asked to the Intervention Group
3. Demographic table of all patients who completed the study

S1. Kidney Palliative/Supportive Care Note Template

**Kidney Supportive CARE/Kidney CARES Note**

Referring Doctor:

Reason for Consultation/Chief Complaint:

Cause of kidney failure

Patient Language:

Interpreter:

Kidney History: CKD Stage:

Kidney Replacement Therapy Details or Choice (Modality/Conservative Kidney Management):

Karnofsky Performance Score:

Tangri Risk of Progression Score (if appropriate)

Hemodialysis Mortality Score (if appropriate)

Charlson Comorbidity Index/Estimating Prognosis for Dialysis Patients (if appropriate)

Hospitalizations in the last six months:

Integrated Palliative Outcome Score-Renal

Health Care Proxy:

Medical Order for Life Sustaining Treatment

Advance Directive:

Past Medical History

Past Surgical History:

Family History:

Social History:

Allergies:

Medications:

Spirituality:

Functional Status:

Interval history/HPI:

Symptoms/Review of Systems:

Physical Exam:

Labs:

Impressions and Recommendations:

Decisional capacity:

Post-Consult Advance Care Planning:

Health Care Proxy:

MOLST:

Advance Care Planning Conversation: (Yes/No)

Visit Activities: Time Spent:

## S2. Exit interview given to the intervention group

### *General Experience Questions:*

- 1) Was the palliative care clinic useful or helpful to you?
- 2) What about the palliative care clinic was useful? Please rank the most important elements. Why were these things useful?
- 3) Do you wish you had been introduced to the palliative care clinic earlier?
- 4) Do you wish you had been introduced to the palliative care clinic about when you were actually introduced?
- 5) What about the palliative care clinic was not useful to you and why?
- 6) Is there anything that the palliative care clinic could have done that would have allowed you to participate more fully?
- 7) If transportation would have been provided, would that have enhanced your participation in:
  - a. Caregiver classes?
  - b. Patient care classes?
  - c. Art Experientials?
  - d. Other?
- 8) What services would you have wanted that aren't provided already and why?
- 9) How did the palliative care clinic affect your sense of connection/support to: (answer choices: positive impact, remained the same, negative impact)
  - a. The palliative care clinic?
  - b. Your nephrologist?
  - c. Your family?
  - d. NYU?

### *Symptom Questions:*

- 1) Did you find the palliative care clinic was helpful in managing your physical symptoms?
- 2) Were there any physical symptoms that were not addressed during this past year in your healthcare?
- 3) Did you utilize the psychotherapy/integrative health services?

### *Spiritual Questions:*

- 1) Was the palliative care clinic helpful to your spiritual well-being?
- 2) Why?
- 3) What was it like to have someone ask about your spirituality?

### *Advance Care Planning Questions/Dialysis Decision-Making Questions:*

- 1) Was talking about advance care planning and/or end-of-life with the palliative care clinic:
  - a. Uncomfortable?
  - b. Novel?
  - c. Desired?
- 2) What did it mean to you to discuss these difficult topics with the Kidney Palliative Care team?
- 3) Was the palliative care clinic helpful for you with the dialysis decision-making?
- 4) Was the palliative care clinic helpful for you in providing an explanation of conservative management as a treatment option?
- 5) Had you heard of conservative management before attending the clinic?

*Satisfaction with Care Questions:*

- 1) Did working with the palliative care team improve , worsen, or have no effect on your satisfaction with:
  - a. Your nephrologist?
  - b. NYU?
  - c. Your family caregivers
- 2) Is there anything we have not asked you that we should have asked you?

*Health Care Utilization Questions:*

- 1) Did the kidney palliative care team ever results in your avoiding having to go to:
  - a. See your primary care provider?
  - b. The emergency room?
  - c. The pharmacy?
  - d. Be admitted to the hospital?

*Participation in a palliative care clinical trial Questions:*

- 1) Have you ever taken part in a research study before?
- 2) Did you find the process cumbersome?
- 3) Would you say yes to participating again and would you encourage others to participate?

S3. Demographic table of all patients who completed the study

| <b>Table 1: Baseline demographics of patients who completed the study</b> |                                    |                |                     |
|---------------------------------------------------------------------------|------------------------------------|----------------|---------------------|
|                                                                           | <b>Characteristic</b>              | <b>Control</b> | <b>Intervention</b> |
|                                                                           |                                    | N=14           | N=13                |
| <b>Age (mean (SD))</b>                                                    |                                    | 67 (15)        | 71 (9)              |
| <b>Sex (n, %)</b>                                                         | Female                             | 8 (57)         | 8 (62)              |
|                                                                           | Male                               | 6 (43)         | 5 (39)              |
| <b>Race (n, %)</b>                                                        | American Indian or Alaska Native   | 0 (0)          | 0 (0)               |
|                                                                           | Asian                              | 0 (0)          | 1 (8)               |
|                                                                           | Black or African American          | 4 (29)         | 4 (32)              |
|                                                                           | White                              | 10 (71)        | 8 (62)              |
| <b>Education (n, %)</b>                                                   | Less than high school              | 1 (7)          | 0 (0)               |
|                                                                           | High school/GED                    | 3 (21)         | 6 (46)              |
|                                                                           | College                            | 5 (36)         | 2 (15)              |
|                                                                           | Graduate/professional degree       | 5 (36)         | 5 (39)              |
| <b>Ethnicity (n, %)</b>                                                   | Hispanic/Latino                    | 0 (0)          | 3 (23)              |
|                                                                           | Non-Hispanic or Latino             | 14 (100)       | 10 (77)             |
| <b>Comorbidities (n, %)</b>                                               | Cancer- history of or in remission | 3 (21)         | 1 (8)               |
|                                                                           | Congestive Heart Failure           | 1 (7)          | 0 (0)               |
|                                                                           | Coronary Artery Disease            | 3 (21)         | 1 (8)               |
|                                                                           | Diabetes                           | 5 (36)         | 6 (46)              |
|                                                                           | Liver Disease                      | 1 (7)          | 0 (0)               |
|                                                                           | None of the Above                  | 0 (0)          | 2 (15)              |
|                                                                           | Other                              | 1 (7)          | 3 (23)              |
| <b>Charlson Comorbidity Score (mean (SD))</b>                             |                                    | 6 (2)          | 5 (2)               |
| <b>Karnofsky Performance Score (mean (SD))</b>                            |                                    | 66 (26)        | 83 (18)             |
| <b>GFR (mean (SD), mL/min/1.73m<sup>2</sup>)</b>                          |                                    | 11 (3)         | 11 (4)              |
| <b>Cause of Kidney Failure (n, %)</b>                                     | Diabetes                           | 4 (29)         | 3 (23)              |
|                                                                           | Glomerular Disease                 | 2 (14)         | 0 (0)               |
|                                                                           | Hypertension                       | 3 (21)         | 6 (46)              |
|                                                                           | Other                              | 5 (36)         | 4 (31)              |
| <b>Albumin (mean (SD), g/dL)</b>                                          |                                    | 3.8 (0.4)      | 3.9 (0.4)           |
| <b>Hemoglobin (mean (SD), g/dL)</b>                                       |                                    | 9.4 (2)        | 10.2 (3)            |
| <b>Lives alone (n, %)</b>                                                 |                                    | 7 (50)         | 5 (39)              |
| <b>Presence of a Health Care Proxy (n, %)</b>                             |                                    | 11 (79)        | 7 (54)              |
| <b>Presence of Advance Care Planning Documents (n, %)</b>                 |                                    | 5 (36)         | 3 (23)              |
